# Supplementary material for: Metformin reduces the clonal fitness of Dnmt3aR878H hematopoietic stem and progenitor cells by reversing their aberrant metabolic and epigenetic state
Source: Research Square preprint supplement (doi:10.21203/rs.3.rs-3874821/v1), 2024-02-06
Supplement: Supplementary file 1 [file 13f693fbda800e8e7c068cc3.xlsx]

## Sheet: Extended Table 1-Metabolites
							WT Veh 1	WT Veh 2	WT Veh 3	WT Met 1	WT Met 2	WT Met 3	RH Veh 1	RH Veh 2	RH Veh 3	RH Met 1	RH Met 2	RH Met 3											Averages				WT Met v. WT Veh		RHVeh v. WT Veh		RH Met v. RH Veh		RH Met v. WT MET		RH Met v. WT Veh		Tetradecenoic acid
N.	compound	CmpdID	Pathway	parent	medRt	Polarity	AC6	AC12	AC17	AC2	AC7	AC13	AC3	AC8	AC19	AC4	AC9	AC15	ACTMix00	ACTMix01	ACTMix02	ACTMix03	blank00	blank01	blank02	blank03	blank04		WT Veh	WT Met	RH Veh	RH Met	fold chg	p-value	fold chg	p-value	fold chg	p-value	fold chg	p-value	fold chg	p-value	compound	Pathway
1	L-arginine	C00062	Amino acids	175.119	0.631763	5+	535615	324727	334648	470267	702576	396446	212846	404552	574262	847646	898006	433391	425744	381564	446620	440931	93960.9	182704	214782	234904	289204	0.0695032	398330	523096	397220	726348	1.31322	0.339008	0.997213	0.993338	1.82858	0.0711219	1.38855	0.306931	1.82348	0.113589	L-arginine	Amino acids
2	L-aspartate	C00049	Amino acids	134.045	0.674234	5+	128786	80024.2	116420	98493.2	122344	75491.5	72229.5	117773	145964	267318	215651	156243	103050	133095	91145.4	103153	19597.4	41485.3	64576.6	156304	202980	0.166341	108410	98776.4	111989	213070	0.911137	0.654071	1.03301	0.897138	1.9026	0.0294743	2.1571	0.0304433	1.96541	0.0412501	L-aspartate	Amino acids
3	L-glutamate	C00025	Amino acids	148.06	0.661606	5+	664645	543340	566689	686890	658229	428908	480701	666573	543943	1009888	726235	672820	629031	745933	582314	533087	181079	193349	218614	397401	533521	0.146295	591558	591342	563739	802981	0.999635	0.998194	0.952973	0.695114	1.42438	0.0562369	1.3579	0.185928	1.3574	0.129536	L-glutamate	Amino acids
4	L-leucine/isoleucine	C00123	Amino acids	132.102	1.0104	5+	265214	329722	420868	175919	327223	331368	141850	188946	364169	258209	254976	374345	178942	199268	222276	278927	64348.5	104645	122881	152631	209469	0.196394	338602	278170	231655	295844	0.821526	0.212875	0.684152	0.129404	1.27709	0.228942	1.06354	0.398781	0.873722	0.257172	L-leucine/isoleucine	Amino acids
5	L-lysine	C00047	Amino acids	147.113	0.603251	5+	182383	162201	166321	173645	257906	166252	120936	178947	211559	251942	251074	196237	164029	195582	149847	189718	82878.8	192226	188971	248250	331848	0.123284	170301	199268	170481	233084	1.17009	0.389444	1.00105	0.995057	1.36722	0.0622183	1.1697	0.384899	1.36866	0.0319218	L-lysine	Amino acids
6	L-methionine	C00073	Amino acids	150.058	0.887967	5+	32202.2	36737.4	64261.8	27641.5	52299.4	33845.5	22256.5	20787.8	48166.8	64223.8	9213.32	45755.7	25608	19147.5	21641.4	30687.4	585.122	1762.76	5509.83	0	5260.02	0.207543	44400.5	37928.8	30403.7	39730.9	0.854243	0.630812	0.684761	0.355005	1.30678	0.319861	1.04751	0.92414	0.894831	0.818103	L-methionine	Amino acids
7	L-phenylalanine	C00079	Amino acids	166.086	0.671699	5+	56602	162972	117318	125990	131899	97595.7	48997.8	63972.8	145102	99781.6	26291.4	125177	129776	136005	109793	128018	8353.07	37792.2	6416.42	8214.66	7550.59	0.0895204	112297	118495	86024.3	83750.1	1.05519	0.42919	0.766041	0.286681	0.973564	0.479744	0.706781	0.165849	0.745789	0.270456	L-phenylalanine	Amino acids
8	L-tryptophan	C00078	Amino acids	205.097	1.72042	5+	220196	359021	226576	177590	247877	375506	121503	175966	249901	245533	167078	376966	206010	181334	217116	237110	31250.2	102262	100472	111340	145107	0.110541	268598	266991	182457	263192	0.994018	0.491803	0.679294	0.107699	1.44249	0.161417	0.985773	0.483107	0.979875	0.473404	L-tryptophan	Amino acids
9	L-tyrosine	C00082	Amino acids	182.081	0.895638	5+	108390	175896	201241	89502.9	144079	125256	59002	87388.8	150832	147054	120457	195746	83569.7	77194.3	83560.3	99785.7	115826	127322	114414	177157	241195	0.112188	161842	119612	99074.3	154419	0.739068	0.257399	0.612166	0.180941	1.55862	0.0943284	1.29099	0.270473	0.954131	0.844181	L-tyrosine	Amino acids
10	L-valine	C00183	Amino acids	118.086	0.666884	5+	7307818	7313240	5916538	6456826	13069160	4242052	5200652	4578218	5731850	7382022	4952906	8045578	4372614	5311818	5709226	7252834	493171	811980	988759	1291332	1314176	0.211907	6.84587e+06	7.92268e+06	5170240	6793502	1.15729	0.709582	0.755235	0.0428135	1.31396	0.0894784	0.857475	0.708654	0.992351	0.962567	L-valine	Amino acids
11	ATP	C00002	Nucleotides	505.988	0.604427	5-	131152	60269	76993.2	91407.2	124666	75993.4	106445	111926	52209.2	145370	71419.3	84409.7	17358.4	33195.2	81690.4	53514.9	0	0	0	0	4194.1	0.598017	89471.3	97355.7	90193.1	100400	1.08812	0.387434	1.00807	0.490553	1.11316	0.374256	1.03127	0.457746	1.12214	0.37214	ATP	Nucleotides
12	ADP	C00008	Nucleotides	426.022	0.612911	5-	54681.3	33303.8	49452.7	41725.1	62393.2	50664	14191.1	48024.1	38603.1	87411.9	43318.5	52929.7	32906	31606.4	39826.3	38315.6	0	0	0	1738.53	5997.64	0.112657	45812.6	51594.1	33606.1	61220	1.1262	0.5465	0.733556	0.365123	1.82169	0.08737	1.18657	0.547376	1.33631	0.35816	ADP	Nucleotides
13	AMP	C00020	Nucleotides	346.055	0.671062	5-	520414	772542	601359	390691	707659	503480	335890	327167	626146	732424	319379	714795	480588	465553	508319	501423	358.572	782.114	449.031	1951.66	6225.1	0.0400079	631438	533943	429734	588866	0.845598	0.458141	0.680564	0.176884	1.3703	0.197086	1.10286	0.754048	0.932579	0.795859	AMP	Nucleotides
14	Adenosine	C00212	Nucleotides	268.103	0.965538	5+	67141.3	47077.4	68094.4	81304.5	41647.7	44183.9	65507.6	64875.3	56210.8	57057.1	71479.7	65963	41720.2	36031.8	46430.2	45989.5	2322.69	7699.48	12087.3	13830.9	19292.5	0.113593	60771	55712	62197.9	64833.3	0.916753	0.372662	1.02348	0.429003	1.04237	0.318285	1.16372	0.267986	1.06685	0.319931	Adenosine	Nucleotides
15	GDP	C00035	Nucleotides	442.016	0.603687	5-	77185.4	44884.9	56741.9	37472.8	117419	72681.2	61591.3	54768.5	58912.7	119024	67970.8	87665.7	20800.5	31499.1	59075.2	39743.6	0	0	0	304.126	1652.52	0.428196	59604	75857.7	58424.2	91553.4	1.27269	0.550785	0.980205	0.90849	1.56705	0.0458631	1.20691	0.598673	1.53603	0.143762	GDP	Nucleotides
16	CDP	C00112	Nucleotides	402.01	0.596213	5-	46775.2	24888.3	31914.6	25272.2	33668.8	25686.2	43949.4	52678.3	44249.2	46712.4	31352.5	17826	23354.6	21756.8	24959.8	25847	0	0	0	0	465.506	0.0752916	34526	28209.1	46959	31963.6	0.817038	0.209128	1.3601	0.0764626	0.680672	0.0821855	1.1331	0.345475	0.925784	0.410003	CDP	Nucleotides
17	CMP	C00055	Nucleotides	324.058	0.668665	5+	40586.9	41342.3	80519.8	31318.9	91540	13256.4	12917.7	22434	83593.1	89177.9	0	78202.9	45039.8	53838.1	55128.3	55232.1	0	6789.56	3153.71	0	2607.07	0.0934397	54149.7	45371.7	39648.3	55793.6	0.837895	0.762166	0.732198	0.603702	1.40721	0.337506	1.2297	0.790632	1.03036	0.960275	CMP	Nucleotides
18	UTP	C00075	Nucleotides	482.961	0.603282	5-	53341	11062.8	13219.7	19085.8	27796.4	17357.1	27475.2	46156.2	17977.9	24678.6	37419.8	12702.1	6919.68	12866.1	23805.9	14697.9	0	0	0	0	0	0.479949	25874.5	21413.1	30536.4	24933.5	0.827576	0.38393	1.18018	0.392929	0.816517	0.317597	1.1644	0.33821	0.963633	0.477236	UTP	Nucleotides
19	UDP	C00015	Nucleotides	402.994	0.597496	5-	185176	86990.1	111810	99857.4	129862	88123.9	142743	143787	125646	163756	96512.9	95455.7	85303.2	78432.6	95433.6	90510.2	0	0	0	0	1263.6	0.0832831	127992	105948	137392	118575	0.827768	0.264317	1.07344	0.385057	0.863041	0.232708	1.11918	0.324994	0.926422	0.406162	UDP	Nucleotides
20	Hypoxanthine	C00262	Nucleotides	137.046	0.894381	5+	57642.6	84921.4	189742	34237.2	36484.9	97742.3	49255.6	42375.2	129993	46651.1	18315.5	109786	33926.2	38047	45322.1	63807.2	5920.38	5015.95	0	15353.3	14334.7	0.292039	110769	56154.8	73874.5	58250.8	0.506956	0.147302	0.666927	0.24717	0.78851	0.354643	1.03733	0.476977	0.525879	0.169888	Hypoxanthine	Nucleotides
21	Xanthine	C00385	Nucleotides	151.025	0.677432	5-	6777.31	48521.6	42121.6	12446.3	21214.8	29756.2	4909.27	13216.6	27568.5	13197.6	5860.6	50627.8	19269.9	22692.8	17062.1	27669.7	1808.8	3745.46	3581.02	3985.57	3175.33	0.213165	32473.5	21139.1	15231.5	23228.7	0.650964	0.230432	0.469042	0.151091	1.52505	0.315063	1.09885	0.447044	0.715311	0.325933	Xanthine	Nucleotides
22	(S)(+)-Allantoin	C02350	Nucleotides	157.036	0.667481	5-	10982.7	30487.7	10090.9	3480.31	11745.4	22365.7	0	9406.57	11362.7	12292.5	11787	24713.7	15905.2	15323.4	14083.1	20394	2891.48	2791.22	2884.44	2392.19	3289.25	0.167537	17187.1	12530.5	6923.1	16264.4	0.729061	0.617409	0.402807	0.244169	2.3493	0.0821135	1.29799	0.617613	0.946313	0.912474	(S)(+)-Allantoin	Nucleotides
23	Nicotinamide	C00153	Nucleotides	123.055	0.940608	5+	2444364	2306832	2835790	2189860	2016368	1865366	1652334	1768895	1803860	2351344	1939114	2491833	1293024	1550664	1426114	1445003	217824	219770	286972	231149	532609	0.0740254	2.529e+06	2.02386e+06	1.7417e+06	2.26076e+06	0.800264	0.0517101	0.688691	0.00881911	1.29802	0.0196467	1.11705	0.281609	0.893937	0.307185	Nicotinamide	Nucleotides
24	UDP-glucose	C00029	Nucleotides	565.047	0.593286	5-	45817.9	22997.5	34916.6	31999.9	32290.9	17401.2	40703.9	41034.6	31155.5	50187	31264.2	26323.8	28974.2	31444.3	22286.5	18687.3	0	0	0	0	0	0.232338	34577.4	27230.7	37631.4	35925	0.787529	0.211014	1.08832	0.349411	0.954656	0.420383	1.31928	0.188998	1.03897	0.448706	UDP-glucose	Nucleotides
25	Phosphate	C00009	Phosphates	98.984	0.733369	5+	28208150	28105390	32634200	19074700	24321290	30906040	26071940	24827340	34445110	25270310	31420360	32537230	16949660	18216850	28693050	28457810	4750.75	23696	31128.7	281455	374342	0.275922	2.96492e+07	2.47673e+07	28448130	2.97426e+07	0.835345	0.130581	0.959489	0.369721	1.0455	0.374353	1.20088	0.145905	1.00315	0.487071	Phosphate	Phosphates
26	Diphosphate	C00013	Phosphates	176.935	0.609152	5-	10642790	13322150	11343700	8625121	7140622	13547300	11876660	12714280	10659200	8084032	11622210	11370580	7607078	8486299	11851940	9496966	0	0	0	655.913	0	0.195675	1.17695e+07	9.77101e+06	1.175e+07	1.03589e+07	0.830195	0.197144	0.998343	0.492686	0.881608	0.170194	1.06017	0.403245	0.880148	0.184377	Diphosphate	Phosphates
27	D-Glucose	C00031	Glycolysis	179.055	0.652225	5-	1109225	136089	35037.2	1060899	2931724	144015	764930	777370	61415.2	1745713	1019801	162203	537196	614660	798389	749496	96045.8	91586.7	101298	90962.8	128627	0.178217	426784	1.37888e+06	534572	975906	3.23086	0.34446	1.25256	0.808454	1.82558	0.219966	0.707753	0.690016	2.28665	0.391115	D-Glucose	Glycolysis
28	D-Glucose 6/1-phosphate	C02965	Glycolysis	259.022	0.611562	5-	628720	145164	141496	592520	1052333	135048	480737	436428	137999	1130823	502168	96648.6	268614	310800	340048	331507	509.586	420.452	627.631	3696.65	3945.98	0.101934	305127	593300	351721	576547	1.94444	0.40564	1.15271	0.822289	1.63921	0.26023	0.971762	0.96866	1.88953	0.471348	D-Glucose 6/1-phosphate	Glycolysis
29	D-Fructose 1-6-bisphosphate	C00354	Glycolysis	338.988	0.603809	5-	127636	21861.6	10216.1	43065	111438	25026.3	101576	143628	7154.72	145204	87205.4	22150.8	18858.7	23863.3	48596	60276.9	0	0	0	0	0	0.522136	53237.9	59843.1	84119.6	84853.5	1.12407	0.446024	1.58007	0.302169	1.00872	0.494883	1.41793	0.300966	1.59385	0.28645	D-Fructose 1-6-bisphosphate	Glycolysis
30	D-Glyceraldehyde 3-phosphate/Glycerone phosphate	C00118	Glycolysis	168.989	0.605682	5-	105707	7644.93	7599.6	62431.3	66579.9	9223.78	61191.1	63373	9570.42	91767.8	31189.5	7690.97	24554.5	31599.7	58473.3	49820.1	0	0	0	0	1156.13	0.382507	40317	46078.3	44711.5	43549.4	1.1429	0.442743	1.109	0.455738	0.974009	0.485763	0.945117	0.469565	1.08017	0.470606	D-Glyceraldehyde 3-phosphate/Glycerone phosphate	Glycolysis
31	1/2-3-Bisphosphoglycerate	C00236	Glycolysis	264.952	0.60458	5-	59757.8	21243	21104.3	16853.5	40887.7	9412.73	32971.5	35392.7	17584.9	54068	36923.3	20970.8	7735.88	9325.18	20302	21797.6	0	0	0	467.965	344.834	0.492402	34035.1	22384.6	28649.7	37320.7	0.657693	0.506562	0.84177	0.720404	1.30266	0.238515	1.66725	0.32978	1.09654	0.847541	1/2-3-Bisphosphoglycerate	Glycolysis
32	2/3-Phospho-D-glycerate	C00631	Glycolysis	184.984	0.602525	5-	715878	218639	200792	402842	685734	193512	475821	563168	182103	763684	484870	246462	301545	316028	415219	366996	0	0	0	391.403	0	0.147974	378436	427362	407031	498339	1.12928	0.835623	1.07556	0.895502	1.22433	0.326917	1.16608	0.748474	1.31684	0.62302	2/3-Phospho-D-glycerate	Glycolysis
33	Phosphoenolpyruvate	C00074	Glycolysis	166.974	0.604644	5-	162935	38476.8	47188.8	76607.8	131585	38124	97589.4	118519	51832.9	122210	107930	43899.8	76655.2	74675.3	83980.9	78278.8	0	0	0	0	0	0.0510639	82866.7	82105.6	89313.9	91346.7	0.990815	0.988212	1.0778	0.892257	1.02276	0.475514	1.11255	0.811434	1.10233	0.864981	Phosphoenolpyruvate	Glycolysis
34	Pyruvate	C00022	Glycolysis	87.0072	0.647992	5-	144981	114648	72828.5	108011	216351	143500	107821	109689	80679	163685	144378	141171	112030	106842	104695	141693	81350.6	77866	69871.4	81761.9	90577.5	0.147846	110819	155954	99396.2	149744	1.40728	0.302143	0.896922	0.644383	1.50654	0.00633984	0.960184	0.858449	1.35125	0.152507	Pyruvate	Glycolysis
35	Lactate	C01432	Glycolysis	89.0228	0.641634	5-	1235244	1175828	676260	707114	1525428	1592702	693257	611073	801027	1388930	1296456	1658076	906190	1091937	1123501	1084719	1421114	1454606	1490064	1897756	2116908	0.0935567	1.02911e+06	1.27508e+06	701786	1.44782e+06	1.23901	0.503912	0.681934	0.152564	2.06305	0.00178946	1.13547	0.600969	1.40687	0.114162	Lactate	Glycolysis
36	Mannitol/Sorbitol	C00392/C00794	Other sugars	181.071	0.653343	5-	6598.43	123018	56540.1	12862.2	14560	161677	6789.61	9601.58	57559.2	12920.9	19814	219373	35719.1	35736.4	65548.2	55423	10881.9	11507.1	13844.9	9029.59	15524	0.309305	62052.1	63033.1	24650.1	84035.9	1.01581	0.987687	0.397249	0.375362	3.40915	0.221025	1.3332	0.814363	1.35428	0.78575	Mannitol/Sorbitol	Other sugars
37	Citrate	C00158	TCA cycle	191.019	0.599792	5-	3803478	4163865	2899863	3535901	5298286	3866745	3792879	4482518	3548998	6234900	5376008	4631476	3983364	4213958	4507349	3741823	5032.21	4572.51	0	0	11525.5	0.079467	3622402	4233644	3941465	5414128	1.16874	0.405928	1.08808	0.533225	1.37363	0.0264447	1.27883	0.172712	1.49462	0.039818	Citrate	TCA cycle
38	2-Oxoglutarate	C00026	TCA cycle	145.013	0.61522	5-	41463.1	55831.9	44037.5	57101.2	65150.7	72219.7	50863.7	38961.9	64963.9	66007.8	81458.7	84105.9	47277.5	56445.8	64954.7	43498.5	1850.62	2612.04	1573.99	1087.81	1051.35	0.181415	47110.8	64823.9	51596.5	77190.8	1.37599	0.046419	1.09521	0.634092	1.49605	0.0264023	1.19078	0.158121	1.63849	0.0137512	2-Oxoglutarate	TCA cycle
39	Succinate	C00042	TCA cycle	117.018	0.608345	5-	123521	260958	128998	107972	154116	214440	68794.7	75945.8	140504	115425	103041	273410	137162	152241	162003	192001	38464.2	46665.5	46172.7	84068	87490.9	0.143885	171159	158843	95081.4	163959	0.928039	0.41612	0.555514	0.102783	1.7244	0.155348	1.03221	0.469547	0.95793	0.461994	Succinate	TCA cycle
40	Fumarate	C00122	TCA cycle	115.002	0.619706	5-	30142	41657.3	65924.4	52595.6	56323.1	35156.3	46906.6	36140	55511.2	71289.1	28118.9	52736.1	38064	54706.4	61384.6	41515.6	6555.44	3786.51	4406.34	11706.1	16369.1	0.224411	45907.9	48025	46185.9	50714.7	1.04612	0.872729	1.00606	0.982543	1.09806	0.378792	1.05601	0.858032	1.1047	0.783474	Fumarate	TCA cycle
41	Malate	C00149	TCA cycle	133.013	0.601162	5-	986780	1014700	1073365	1015545	1431433	824188	690218	752180	1071936	1489995	989869	958673	1037751	866919	1099483	1031534	3378.43	4781.03	4851.23	12349.7	15041.8	0.0986329	1.02495e+06	1.09039e+06	838112	1.14618e+06	1.06385	0.736052	0.817711	0.197423	1.36757	0.107118	1.05117	0.833378	1.11828	0.524396	Malate	TCA cycle
42	Oxaloacetate	C00036	TCA cycle	131	0.63319	5-	106832	128604	162231	104687	113292	121992	114913	96858.9	113839	104051	131417	79749.4	118332	100241	113276	154148	9825.64	8318.47	10155.8	11560.6	13209	0.189809	132556	113324	108537	105073	0.854913	0.158963	0.818801	0.116891	0.968082	0.41973	0.92719	0.313895	0.792667	0.139503	Oxaloacetate	TCA cycle
43	2-Hydroxyglutarate/Citramalate	C02630	Alternative Carboxylic acids	147.029	0.610136	5-	103719	102186	126750	117083	113112	110939	94112.5	57230	132101	114594	93446.9	129355	91295.8	120261	100445	128346	3197.81	3312.47	3941.6	4935.8	5588.2	0.15584	110885	113711	94481.2	112465	1.02549	0.746087	0.852066	0.515605	1.19034	0.247618	0.989041	0.911866	1.01425	0.909823	2-Hydroxyglutarate/Citramalate	Alternative Carboxylic acids
44	6-Phospho-D-gluconate	C00345	Pentose Phosphate Pathway	275.017	0.607039	5-	26706.5	4604.8	9380.39	17007.9	54633.2	7465.07	15279.1	20806.6	14622.5	44435.2	41251.2	5272.67	16396.5	8957.46	20613	15501.4	0	0	381.199	0	440.605	0.313619	13563.9	26368.7	16902.7	30319.7	1.94404	0.465429	1.24616	0.658041	1.79378	0.17533	1.14984	0.846262	2.23532	0.304555	6-Phospho-D-gluconate	Pentose Phosphate Pathway
45	Sedoheptulose 1/7-phosphate	C06222	Pentose Phosphate Pathway	289.033	0.611087	5-	32672.2	8936.26	4254.1	32599.7	80440.4	27256.4	23754.7	27386.6	5219.31	60874.2	37283.2	20111.4	21556.5	13698.9	18037	14278	357.139	0	551.089	403.474	0	0.216423	15287.5	46765.5	18786.9	39422.9	3.05906	0.173967	1.2289	0.769486	2.09843	0.102761	0.842992	0.73985	2.57876	0.176674	Sedoheptulose 1/7-phosphate	Pentose Phosphate Pathway
46	alpha-D-Ribose 1-phosphate	C00620	Pentose Phosphate Pathway	229.011	0.61155	5-	125286	97890.5	116012	83491.7	174534	115288	73584.2	78297.9	86712.7	178714	76519	95247.7	80926.4	69222.3	107617	93741.8	0	0	497.596	1720.05	980.769	0.18818	113063	124438	79531.6	116827	1.10061	0.704	0.703428	0.0197473	1.46894	0.151956	0.938835	0.862461	1.03329	0.913183	alpha-D-Ribose 1-phosphate	Pentose Phosphate Pathway
47	Glutathione	C00051	GSH homeostasis	306.077	0.672049	5-	465744	225384	230828	419032	584799	245973	249689	352415	280367	713335	488544	449832	329760	353251	396015	299595	0	0	496.339	312.492	482.814	0.118024	307318	416601	294157	550570	1.3556	0.434291	0.957173	0.88428	1.87169	0.0214738	1.32158	0.353457	1.79153	0.10005	Glutathione	GSH homeostasis
48	Glutathione disulfide	C00127	GSH homeostasis	611.144	0.573293	5-	87343.8	58587.7	135615	63151.1	37869.9	80313.1	76546.2	61036.1	117032	92309.5	64418.5	111811	30056.3	35597.7	65692.5	92556.8	425.305	1459.06	1278	2537.73	2219.99	0.517739	93848.9	60444.7	84871.4	89513.1	0.644064	0.131221	0.904341	0.382247	1.05469	0.420281	1.48091	0.0953049	0.9538	0.438633	Glutathione disulfide	GSH homeostasis
49	Glutathione/GSSG		GSH homeostasis				5.3323	3.84694	1.70208	6.63539	15.4423	3.06267	3.26194	5.77387	2.39564	7.72765	7.58391	4.02314											3.62711	8.38012	3.81048	6.4449	2.31041	0.282046	1.05056	0.906217	1.69136	0.0853126	0.76907	0.643544	1.77687	0.154136	Glutathione/GSSG	GSH homeostasis
50	Dehydroascorbate	C05422	GSH homeostasis	173.007	0.603065	5-	69466	89298.9	60402.5	110032	114376	75024.7	85141.1	114708	71866.6	160036	123036	95550.8	73170.7	100613	93416.5	85784.4	450.253	337.981	3810.69	3430.52	0	0.132958	73055.8	99811	90572	126207	1.36623	0.151082	1.23976	0.31525	1.39345	0.0947456	1.26446	0.304964	1.72755	0.0608206	Dehydroascorbate	GSH homeostasis
51	Dimethylglycine	C01026	Serine biosynthesis and one-carbon metabolism	102.054	0.615694	5-	17006.8	9354.38	6238.16	25168.2	37952	11562.7	9012.56	9595.54	17105.4	62472.4	27744.1	41514.2	26317.7	25578.4	30435.5	12780.5	0	405.454	1349.74	2139.17	1503.01	0.321168	10866.5	24894.3	11904.5	43910.2	2.29093	0.164829	1.09553	0.813768	3.68854	0.0186576	1.76387	0.207171	4.0409	0.0355299	Dimethylglycine	Serine biosynthesis and one-carbon metabolism
52	Putrescine	C00134	Polyamines	89.1072	0.629894	5+	71241.8	147802	134212	109383	122118	84431.4	61249.2	69114.2	123321	117063	96627.1	134174	93914.1	106391	75453.7	91895.3	5775.48	7058.86	3737.76	5994.92	4513.47	0.138267	117752	105311	84561.6	115955	0.894346	0.657894	0.718133	0.339205	1.37125	0.116219	1.10107	0.530047	0.984737	0.948131	Putrescine	Polyamines
53	Spermidine	C00315	Polyamines	146.165	0.626503	5+	1734950	1909840	1403607	1195140	1554247	1236331	2301606	2376260	1335805	1625180	3853681	2083586	1927676	2169756	2058925	2277492	767.859	642063	329989	24802.5	20711.4	0.0711238	1682799	1.32857e+06	2004557	2.52082e+06	0.789502	0.130861	1.1912	0.429534	1.25754	0.266494	1.89739	0.15854	1.49799	0.29463	Spermidine	Polyamines
54	Spermine	C00750	Polyamines	203.223	0.620734	5+	166726	186922	165936	234798	169707	99307.3	240183	266129	138576	217494	302857	176112	491743	435543	156595	225045	0	170511	109070	5353.25	3643.88	0.493874	173195	167938	214963	232155	0.969647	0.45055	1.24116	0.175095	1.07998	0.382899	1.38238	0.150316	1.34043	0.0975804	Spermine	Polyamines
55	UDP-N-acetyl-D-glucosamine	C00043	Aminosugars	606.074	0.590371	5-	142060	79484.9	107511	75483	93548.1	71216.6	107432	134662	87378	128204	87335.5	95112.8	87824.6	101469	79123.6	80065.3	370.96	308.244	0	0	4000.23	0.118567	109685	80082.6	109824	103551	0.730112	0.100374	1.00127	0.497707	0.942879	0.376223	1.29305	0.0877841	0.944072	0.397143	UDP-N-acetyl-D-glucosamine	Aminosugars
56	CMP-N-acetylneuraminate	C00128	Aminosugars	613.139	0.583266	5-	27378.4	17943.8	31057.7	30028.8	39499.8	22231.9	19768	22516.7	31605.8	44672.8	30515.4	38392.6	21370.5	21759.7	24483	22981.8	0	0	0	0	0	0.0619161	25460	30586.8	24630.1	37860.3	1.20137	0.463974	0.967407	0.883078	1.53715	0.0358716	1.2378	0.323016	1.48705	0.0935624	CMP-N-acetylneuraminate	Aminosugars
57	Phosphocreatine	C02305	Arginine and proline metabolism	210.028	0.58896	5-	31765.8	30806.7	32362.4	27522.2	31504.5	26322	21812.3	22233.3	32017	16907.7	17769.6	28699.9	26139	25923.8	21840.8	22364.7	0	0	0	0	0	0.0947324	31645	28449.6	25354.2	21125.7	0.899024	0.0607949	0.801209	0.0674261	0.833223	0.22482	0.742567	0.0745111	0.667586	0.0256309	Phosphocreatine	Arginine and proline metabolism
58	Creatine	C00300	Arginine and proline metabolism	132.077	0.67022	5+	2703224	2235447	1989095	1644889	2868308	1695718	1809627	1397709	1848548	1780860	1952107	2410713	1797754	1875560	1822816	1873254	149276	474427	518368	813119	880005	0.020854	2.30926e+06	2.06964e+06	1.68529e+06	2.04789e+06	0.896236	0.311731	0.7298	0.0350809	1.21515	0.100364	0.989493	0.481545	0.88682	0.202823	Creatine	Arginine and proline metabolism
59	Guanidinoacetate	C00581	Arginine and proline metabolism	118.061	0.652577	5+	177618	58652.1	45853.5	100692	220429	65918.1	90207.4	157641	65888.6	235078	251067	121511	94183.5	80295	85577.1	107758	4408.6	2335.33	2172.83	2848.88	7280.82	0.130398	94041.3	129013	104579	202552	1.37187	0.607568	1.11205	0.843783	1.93683	0.0585194	1.57001	0.301717	2.15386	0.137249	Guanidinoacetate	Arginine and proline metabolism
60	Pantothenol	C00864	Panthothenate metabolism	220.118	1.6933	5+	56755.6	84337.3	40940.1	32198.6	46240.6	73267.7	36788.9	60521.8	32556	75910.7	48592.2	76589.7	44286.2	51060.3	54056.2	39933.9	3151.52	6494.76	6633.3	3701.21	2489.18	0.135343	60677.6	50569	43288.9	67030.9	0.833404	0.297169	0.713425	0.160701	1.54845	0.0672242	1.32553	0.169506	1.1047	0.353029	Pantothenol	Panthothenate metabolism
61	Taurine	C00245	Sulfur metabolism	124.006	0.647254	5-	2390861	2176584	2628993	2469989	3317821	2220381	1862702	1743822	2698369	4025655	3051270	3505653	2116251	2322178	2561443	2348184	22496.4	23317.6	26916.8	34483.7	44693.9	0.0779075	2.39881e+06	2669397	2101631	3527526	1.1128	0.490574	0.876113	0.415541	1.67847	0.0128618	1.32147	0.120025	1.47053	0.0220224	Taurine	Sulfur metabolism
62	L-Selenomethionine	C05335	Sulfur metabolism	195.991	0.676401	5-	70093.2	77994.8	68844.5	72369.9	66849.9	64852.5	76566.2	78870.3	88275.4	75089.2	81238.9	70217.3	57506.1	62522.4	89562.6	82574.3	1129.83	1198.7	1303.77	2642.32	2886.83	0.211481	72310.8	68024.1	81237.3	75515.2	0.940718	0.152192	1.12345	0.0617344	0.929563	0.149347	1.11012	0.0636341	1.04431	0.24815	L-Selenomethionine	Sulfur metabolism
63	L-Cysteate	C00506	Sulfur metabolism	167.996	0.766959	5-	8123.97	8297.16	9539.67	5353.14	7178.76	10277.2	5427.06	5124.23	5409.65	6904.06	8537.07	10687.2	3925.25	4163.78	4384.02	10527	270.739	287.075	0	384.211	944.632	0.554809	8653.6	7603.04	5320.31	8709.45	0.878599	0.523541	0.61481	0.00187102	1.63702	0.0184417	1.14552	0.573465	1.00646	0.964595	L-Cysteate	Sulfur metabolism
64	Anthranilate	C00108	Indole and Tryptophan	138.055	0.670934	5+	57742.7	52476.7	55872.1	65048.2	75009.6	53246.2	39988.2	40329.2	79218.7	124528	45093.8	74721.9	48045	39906.7	62394.6	65152.3	3737.86	22019.3	18669.3	40994.9	45006.9	0.221929	55363.8	64434.7	53178.7	81447.8	1.16384	0.233917	0.960532	0.875724	1.53159	0.173762	1.26404	0.517763	1.47114	0.324282	Anthranilate	Indole and Tryptophan
65	Picolinic acid	C10164	Indole and Tryptophan	124.04	0.558078	5+	508321	261315	278792	232441	1162647	263384	284788	335838	216111	923531	59195.9	342850	145359	180140	345941	304331	9080.59	132440	100594	43039.9	76574.3	0.394898	349476	552824	278912	441859	1.58187	0.554039	0.798086	0.461927	1.58422	0.280056	0.799276	0.793806	1.26435	0.746351	Picolinic acid	Indole and Tryptophan
66	g-Oxalo-crotonate	C03453	Indole and Tryptophan	159.028	0.881181	5+	28032.7	45613.2	74098.7	27678.4	15869.8	32896.1	20156.2	21795.3	43401.5	18042.2	0	46763	19023.5	23917.6	18959	23060.2	3742.82	1643.05	2483.78	0	2582.72	0.123367	49248.2	25481.5	28451	21601.7	0.517409	0.0863401	0.577707	0.123726	0.75926	0.341086	0.847744	0.401249	0.43863	0.110854	g-Oxalo-crotonate	Indole and Tryptophan
67	8-Methoxykynurenate	C05830	Indole and Tryptophan	218.048	1.71396	5-	1747.76	16415.6	20436	18601.2	18010.1	13007.6	15288.2	23517.1	17731.2	16145.6	24253.4	18812.6	7131.64	10314.9	7113.14	7259.38	0	0	0	0	679.794	0.197963	12866.4	16539.6	18845.5	19737.2	1.28549	0.285206	1.4647	0.194084	1.04732	0.403376	1.19333	0.171351	1.53401	0.163584	8-Methoxykynurenate	Indole and Tryptophan
68	Glycerol 3-phosphate	C00093	Glycerophospholipid biosynthesis	171.005	0.610678	5-	110478	47674.4	61839	96217.4	162270	46629.7	55938	86512.5	50176.9	131311	56858.1	75352.1	65439.6	69026.1	74778.1	60208	0	394.665	1028.41	3286.1	6069.26	0.0909645	73330.6	101706	64209.1	87840.5	1.38695	0.502192	0.875612	0.701086	1.36804	0.199548	0.863673	0.748042	1.19787	0.647186	Glycerol 3-phosphate	Glycerophospholipid biosynthesis
69	Ethanolamine phosphate	C00346	Glycerophospholipid biosynthesis	140.01	0.606441	5-	232110	172363	208085	187543	234103	191450	157685	145357	188315	285370	148244	244877	112955	114784	176531	163914	375.783	827.769	287.95	5905.32	2531.45	0.231959	204186	204365	163786	226164	1.00088	0.994114	0.802142	0.134086	1.38085	0.108632	1.10666	0.641291	1.10764	0.645284	Ethanolamine phosphate	Glycerophospholipid biosynthesis
70	Acetylcholine	C01996	Glycerophospholipid biosynthesis	146.117	0.672084	5+	791045	541186	562696	602691	1480953	336982	520818	796759	592646	656612	678277	546630	610746	526806	525328	500252	35422.1	42548	50554.6	45810.3	31210.4	0.0891432	631642	806875	636741	627173	1.27742	0.323628	1.00807	0.483379	0.984973	0.461151	0.777286	0.316434	0.992924	0.481331	Acetylcholine	Glycerophospholipid biosynthesis
71	Sphinganine 1-phosphate	C01120	Sphingolipid biosynthesis	380.255	3.68653	5-	45928	42955.9	72185.7	51231.6	53548.5	47965.6	38254.3	44940.6	55465	39115.4	51117	52913.5	43290.8	40531.8	46941.4	45578	0	3308.13	14246.1	21019.9	17039.8	0.0636796	53689.9	50915.2	46220	47715.3	0.94832	0.391581	0.860869	0.259042	1.03235	0.416211	0.937152	0.263495	0.88872	0.295587	Sphinganine 1-phosphate	Sphingolipid biosynthesis
72	L-Carnitine	C00318	Carnitine and fatty acid metabolism	162.112	0.662817	5+	5210792	4357680	3555199	5307472	6582764	2475665	2888462	3713892	3830461	6584302	3737319	4115448	3645017	4565628	3768707	3766199	776534	1058547	993205	846266	721680	0.107572	4374557	4.78863e+06	3477605	4.81236e+06	1.09466	0.766786	0.794962	0.186025	1.38381	0.114449	1.00495	0.988191	1.10008	0.687773	L-Carnitine	Carnitine and fatty acid metabolism
73	acetyl-carnitine (acyl-C2)	C02571	Carnitine and fatty acid metabolism	204.123	0.691112	5+	33771340	24941130	21010990	34310760	43646540	17680650	21688620	26572970	22208170	36921850	14655190	23119870	19112970	26936660	23859230	23315780	261207	369460	300057	257847	204576	0.138081	2.65745e+07	3.18793e+07	23489920	24898970	1.19962	0.282745	0.883928	0.245787	1.05999	0.421524	0.781038	0.261578	0.93695	0.417152	acetyl-carnitine (acyl-C2)	Carnitine and fatty acid metabolism
74	propionyl-carnitine (acyl-C3)	C03017	Carnitine and fatty acid metabolism	218.138	1.05428	5+	45447.3	83178.5	81932.5	48899.5	50324.9	41944.1	31895.7	46843.1	68094.3	44929.2	110435	95780.7	54957.2	49090.6	46301.8	51169.9	19337.7	15494.6	12567.5	6294.77	6263.49	0.0723599	70186.1	47056.2	48944.4	83714.9	0.670449	0.141305	0.697351	0.260745	1.71041	0.0982251	1.77904	0.141002	1.19276	0.594004	propionyl-carnitine (acyl-C3)	Carnitine and fatty acid metabolism
75	butanoyl-l-carnitine (acyl-C4)	C02862	Carnitine and fatty acid metabolism	232.154	1.72782	5+	224918	111058	101212	138778	117890	73845.3	123970	199624	80670.6	129299	50466.6	108764	132277	119074	102279	104744	22369.1	21131.7	8023.32	32858.7	29077	0.121488	145729	110171	134755	96176.6	0.755998	0.232488	0.924692	0.422698	0.713716	0.205264	0.872976	0.334558	0.659968	0.171874	butanoyl-l-carnitine (acyl-C4)	Carnitine and fatty acid metabolism
76	acyl-C4-OH (Hydroxybutyrylcarnitine)	HMDB13127	Carnitine and fatty acid metabolism	248.149	0.69659	5+	210850	178590	157795	267534	377092	108518	118031	145404	142395	230471	57533.5	95841.8	165991	188942	154578	144824	3122.78	2983.07	2168.92	0	0	0.116088	182412	251048	135277	127949	1.37627	0.218269	0.741602	0.0281122	0.945827	0.448501	0.509659	0.130167	0.701428	0.187743	acyl-C4-OH (Hydroxybutyrylcarnitine)	Carnitine and fatty acid metabolism
77	hexanoyl-L-carnitine (acyl-C6)	HMDB00756	Carnitine and fatty acid metabolism	260.185	1.77997	5+	741292	207103	316864	330538	575927	135649	284427	440048	209264	719326	141358	191570	315401	276756	358600	376250	21246	26979.4	24987.4	18773.9	25286.5	0.134723	421753	347372	311246	350751	0.823638	0.36862	0.737982	0.28259	1.12693	0.425405	1.00973	0.494355	0.831652	0.393762	hexanoyl-L-carnitine (acyl-C6)	Carnitine and fatty acid metabolism
78	L-octanoylcarnitine (acyl-C8)	C02838	Carnitine and fatty acid metabolism	288.216	1.83105	5+	169488	20996.6	70552.4	100035	121845	20431.2	51816.6	113286	65675.7	174960	22660.7	24530	71960.3	66103.1	70997.5	58034.4	4254.97	14394.4	10780.3	5516.76	13392.2	0.0953317	87012.2	80770.3	76926.2	74050.2	0.928264	0.456317	0.884086	0.421035	0.962614	0.479959	0.916801	0.457493	0.851033	0.427712	L-octanoylcarnitine (acyl-C8)	Carnitine and fatty acid metabolism
79	O-tetradecanoyl-L-carnitine (acyl-C14)	HMDB05066	Carnitine and fatty acid metabolism	372.31	2.01433	5+	51377.8	16796.5	98501.7	16465.5	37949.2	28127.2	40903.3	27378.6	101439	63051.1	25796	39314.2	12153.7	20329.4	50575.7	40903.2	0	542.488	0	0	0	0.574311	55558.7	27514	56573.7	42720.5	0.495223	0.157912	1.01827	0.488416	0.75513	0.306147	1.55268	0.145906	0.768925	0.324056	O-tetradecanoyl-L-carnitine (acyl-C14)	Carnitine and fatty acid metabolism
80	Propionic/Propanoic acid	C00163	Saturated Fatty acids	73.0279	0.674309	5-	0	47237.7	57600.8	35411.8	34939.6	40745.5	17401.1	33714.9	0	54590.9	34043.7	43770.1	26869.8	23926.8	48348.8	18085.2	0	0	4196.73	0	0	0.45069	34946.2	37032.3	17038.7	44134.9	1.0597	0.912473	0.48757	0.425934	2.59027	0.0381297	1.19179	0.31717	1.26294	0.648804	Propionic/Propanoic acid	Saturated Fatty acids
81	Butanoic/Butyric acid	C00246	Saturated Fatty acids	87.0435	0.716126	5-	56361.6	43238.3	69693.5	33501.4	62860.4	67383.1	36210.9	43507.8	63200.4	49188.1	56957.8	64846.8	26222.5	34132.5	57309.9	55702.1	3969.76	8626.02	12948.6	38380.3	46446.4	0.358866	56431.1	54581.6	47639.7	56997.5	0.967226	0.447201	0.844209	0.236406	1.19643	0.184263	1.04426	0.422219	1.01004	0.476086	Butanoic/Butyric acid	Saturated Fatty acids
82	Octanoic acid (caprylic acid)	C06423	Saturated Fatty acids	143.106	2.04741	5-	301369	6744688	11435880	5773748	10889960	8057742	6678572	8156470	7230678	11559560	7537878	9857137	3604695	3765327	4287742	4625198	68553.7	61334.3	75987.4	105704	120383	0.115657	6.16065e+06	8.24048e+06	7355240	9651525	1.3376	0.589481	1.19391	0.732299	1.3122	0.0691687	1.17123	0.49544	1.56664	0.366535	Octanoic acid (caprylic acid)	Saturated Fatty acids
83	Tetradecanoic acid (myristic acid)	C06424	Saturated Fatty acids	227.201	2.66942	5-	2157684	664281	1852711	2269456	782664	1041787	573951	1273522	1029295	442195	1155863	1092370	974838	1163856	1299738	875062	2820.95	34578.9	53254.7	61435.6	77226.6	0.176244	1.55823e+06	1.36464e+06	958923	896809	0.875763	0.779477	0.615394	0.296466	0.935226	0.424681	0.657179	0.412663	0.575532	0.263982	Tetradecanoic acid (myristic acid)	Saturated Fatty acids
84	Hexadecanoic acid (palmitic acid)	C00249	Saturated Fatty acids	255.232	3.08364	5-	7747238	5472887	7697996	7389108	7431894	6732600	4467097	6934192	7798788	4932272	8473442	6639426	5574328	5814482	7082540	5581404	4420508	2057578	2570413	3786112	3434245	0.12	6972707	7184534	6.40003e+06	6.68171e+06	1.03038	0.800245	0.917868	0.670285	1.04401	0.426667	0.930013	0.656196	0.958267	0.829754	Hexadecanoic acid (palmitic acid)	Saturated Fatty acids
85	Octadecanoic acid (stearic acid)	C01530	Saturated Fatty acids	283.264	3.68733	5-	3824391	3141606	4526068	4164876	4158032	3774511	3300499	3510875	4995776	3857336	4559778	4000726	3082159	3132669	3828107	3631326	39931.3	420822	966790	1305966	1322466	0.107863	3.83069e+06	4032473	3.93572e+06	4139280	1.05268	0.327995	1.02742	0.441219	1.05172	0.370581	1.02649	0.34567	1.08056	0.266776	Octadecanoic acid (stearic acid)	Saturated Fatty acids
86	Tetradecenoic acid (myristoleic acid)	C08322	Monounsaturated Fatty Acids	225.185	2.45916	5-	5616.15	4227.74	3500.83	3398.99	5115.83	11759.4	2296.09	3973.3	4599.55	4770.42	4076.84	3604.93	3898.37	3806.84	5635.88	3771.76	3225.33	2396.68	2519.49	2123.51	2626.52	0.21193	4448.24	6758.09	3622.98	4150.73	1.51927	0.428379	0.814475	0.423281	1.14567	0.264471	0.614187	0.367987	0.933117	0.69545	Tetradecenoic acid (myristoleic acid)	Monounsaturated Fatty Acids
87	Hexadecenoic acid (Palmitoleic acid)	C08362	Monounsaturated Fatty Acids	253.217	2.74813	5-	77370.4	77470.5	49165.3	66834.2	68121.1	294978	34637.8	76560.6	67180.9	39910	78556.8	79854.4	80576.5	84956.9	87920.5	52505.1	94811.2	44733.2	49679.1	43828.3	41899.2	0.212732	68002.1	143311	59459.7	66107.1	2.10745	0.380171	0.874381	0.617739	1.1118	0.367062	0.461283	0.372532	0.972133	0.91218	Hexadecenoic acid (Palmitoleic acid)	Monounsaturated Fatty Acids
88	Octadecenoic acid (Oleic acid)	C00712	Monounsaturated Fatty Acids	281.248	3.12992	5-	863085	603449	737222	560626	728599	810420	511507	544341	842443	540793	825375	891763	561712	618121	744312	696622	159329	119179	136767	218536	280162	0.123906	734585	699882	632764	752644	0.952758	0.757605	0.861389	0.474819	1.18945	0.235243	1.07539	0.706375	1.02458	0.897155	Octadecenoic acid (Oleic acid)	Monounsaturated Fatty Acids
89	Linoleic acid ((9Z,12Z)-Octadecadienoic acid)	C01595	Poly-unsaturated Fatty Acids	279.233	2.77535	5-	544756	287043	483525	273946	473336	390371	199657	352642	506752	267000	385687	455610	288556	308118	425311	298575	57725.2	29755	29056.9	130884	100702	0.193699	438441	379218	353017	369432	0.864922	0.287026	0.805163	0.254429	1.0465	0.441312	0.974196	0.454183	0.842603	0.25444	Linoleic acid ((9Z,12Z)-Octadecadienoic acid)	Poly-unsaturated Fatty Acids
90	a-Linolenic acid (Octadecatrienoic acid)	C06427	Poly-unsaturated Fatty Acids	277.217	2.57445	5-	35881	20216.2	28505.2	15639	32159.8	36904.4	17078.1	30080.3	42066.8	28212.9	19648.3	41340.5	16707.5	22386.7	22805.7	29075.1	7959.59	2002.82	1072.52	19150	11585	0.22225	28200.8	28234.4	29741.8	29733.9	1.00119	0.498402	1.05464	0.43261	0.999737	0.499693	1.05311	0.438001	1.05436	0.426536	a-Linolenic acid (Octadecatrienoic acid)	Poly-unsaturated Fatty Acids
91	Arachidonic acid (Eicosatetraenoic acid)	C00219	Poly-unsaturated Fatty Acids	303.233	2.67478	5-	537826	470795	801686	513949	608641	426312	289007	547161	658297	455225	597386	878765	435592	520337	548503	356380	1329.18	2014.58	490.458	3413.67	1909.88	0.186977	603436	516301	498155	643792	0.855602	0.486886	0.825531	0.518492	1.29235	0.21452	1.24693	0.398847	1.06688	0.813606	Arachidonic acid (Eicosatetraenoic acid)	Poly-unsaturated Fatty Acids
92	Docosahexaenoic acid	C06429	Poly-unsaturated Fatty Acids	327.233	2.56643	5-	139721	140285	130391	110819	163648	123040	82169	133794	138873	133015	145940	224511	95106.9	118453	131912	104374	502.535	0	497.498	0	798.566	0.143451	136799	132502	118279	167822	0.96859	0.804952	0.864618	0.37102	1.41887	0.108542	1.26656	0.341469	1.22678	0.341562	Docosahexaenoic acid	Poly-unsaturated Fatty Acids
93	Adrenic acid (7,10,13,16-Docosatetraenoic acid)	C16527	Poly-unsaturated Fatty Acids	331.264	2.96012	5-	119812	98198.9	136234	112142	142416	93601.8	63832.4	101334	116234	98668.3	116360	158203	94884.8	103600	110970	79686.1	0	0	0	874.023	0	0.138243	118082	116053	93800.1	124410	0.982823	0.915673	0.794367	0.27225	1.32634	0.131753	1.07201	0.731082	1.0536	0.776148	Adrenic acid (7,10,13,16-Docosatetraenoic acid)	Poly-unsaturated Fatty Acids
94	Dihomo-gamma-linolenic acid ((8Z-11Z-14Z)-Icosatrienoic acid)	C03242	Essential fatty acids	305.248	2.86746	5-	80195.4	60420.6	89607.2	53819.8	70396.1	65138.5	40730.9	54768.2	75706.3	60594.3	60318.2	96967.9	50016.8	53777.4	61057.6	51828.9	3626.15	1069.52	1959.14	10708.5	11086.8	0.0893768	76741.1	63118.1	57068.4	72626.8	0.822482	0.240581	0.743649	0.213552	1.27263	0.191009	1.15065	0.50863	0.946388	0.796171	Dihomo-gamma-linolenic acid ((8Z-11Z-14Z)-Icosatrienoic acid)	Essential fatty acids
95	Docosapentaenoic acid ((7Z-10Z-13Z-16Z-19Z)-Docosa-7-10-13-16-19-pentaenoic acid)	C16513	Essential fatty acids	329.248	2.69053	5-	53542.4	56553.6	59887.4	38332.9	63286	59804	28044.2	59049	53521.4	44200.5	55997.7	109955	42503.3	49845	61638.2	37257.7	0	0	0	0	0	0.220979	56661.1	53807.7	46871.5	70050.9	0.949639	0.7398	0.827226	0.370934	1.49453	0.179414	1.30188	0.495603	1.23631	0.545992	Docosapentaenoic acid ((7Z-10Z-13Z-16Z-19Z)-Docosa-7-10-13-16-19-pentaenoic acid)	Essential fatty acids
96	Glycochenodeoxycholate (primary/conjugated)	C05466	Bile acids	448.306	1.87918	5-	1974.86	22131.6	7168.32	0	3238.85	12862.2	1604.05	1663.01	4539.22	1112.91	888.216	16374.9	8500.03	7331.44	8135.09	6933.22	2318.42	4149.43	1897.49	5110.03	3492.09	0.0930679	10424.9	5367.02	2602.09	6125.35	0.514827	0.259766	0.249603	0.135131	2.35401	0.268204	1.14129	0.455817	0.587568	0.308094	Glycochenodeoxycholate (primary/conjugated)	Bile acids
97	Taurodeoxycholate (primary/conjugated)	C05463	Bile acids	498.289	1.84095	5-	3782.55	19108.3	7400.19	1052.92	2512.61	18606.4	817.783	726.968	7263.27	1264.28	1517.94	18757.7	7112.04	6436.94	8940.74	5645.47	0	604.298	1035.41	834.893	0	0.19982	10097	7390.64	2936.01	7179.98	0.731964	0.364489	0.29078	0.116717	2.44549	0.265013	0.971496	0.490214	0.7111	0.356957	Taurodeoxycholate (primary/conjugated)	Bile acids
98	13(S)-HODE	C14762	Arachidonate metabolism	295.228	2.35142	5-	75918.5	55930.1	85861.6	36393.2	81992.1	86077.5	61444.3	45951.1	86255.3	79556.7	54835.5	83327.7	28308.1	31892.3	70413.3	81648.4	39920.7	11690	18014.5	82813.1	49237.9	0.507893	72570.1	68154.3	64550.2	72573.3	0.939151	0.410088	0.889488	0.306844	1.12429	0.307715	1.06484	0.410338	1.00004	0.499903	13(S)-HODE	Arachidonate metabolism
99	Thromboxane B2	C05963	Arachidonate metabolism	369.228	1.90434	5-	1980.47	7140.98	10262.5	2693.37	3979.33	6085.33	1879.2	2387.23	6990.43	2207.24	3837.12	6991.86	5243.26	6294.21	6100.09	3001.09	1838.91	1073.88	1320.87	1778.05	662.842	0.292606	6461.31	4252.68	3752.29	4345.41	0.658176	0.444986	0.580731	0.404742	1.15807	0.398079	1.02181	0.959531	0.672527	0.49096	Thromboxane B2	Arachidonate metabolism
100	Leukotriene A4	C00909	Arachidonate metabolism	317.207	2.77175	5-	12407.6	7426.81	11965.4	6537.37	12386.1	7130.22	8157.76	8875.27	9865.24	8804.67	10371.7	8315.48	7094.98	6882.9	10054.8	14364	960.247	439.105	749.402	4461.76	1561.97	0.363672	10599.9	8684.55	8966.09	9163.95	0.819303	0.238766	0.845863	0.191248	1.02207	0.407683	1.0552	0.409376	0.864529	0.223938	Leukotriene A4	Arachidonate metabolism
101	Cholesterol sulfate	C18043	Sterols	465.304	2.33358	5-	113691	128634	127990	115218	166324	226757	93112.2	81170.6	98695.4	109483	168154	176352	110208	135708	117186	105868	11952.6	12960	11751.4	12495.7	9373.77	0.112274	123438	169433	90992.7	151330	1.37261	0.231143	0.737152	0.0102954	1.6631	0.0248377	0.893154	0.662728	1.22596	0.266444	Cholesterol sulfate	Sterols

## Sheet: Extended Table 2
Supplementary Table 2
List of prime editing RNAs
Description	Sequence 5' -> 3'
pegRNA B2M pegRNA 5 B2M ex1	mG*mA*mG*UAGCGCGAGCACAGCUAGUUUUAGAGCUAGAAAUAGCAAGUUAAAAUAAGGCUAGUCCGUUAUCAACUUGAAAAAGUGGCACCGAGUCGGUGCUCCGUGGCCUGAGCUGUGCUCGCGCUmU*mU*mU
nicking gRNA 5 B2M ex1	AGTGGAGGCGTCGCGCTGGC
epegRNA DNMT3A 5 ex23	mC*mG*mU*CUCCAACAUGAGCCGCUGUUUUAGAGCUAGAAAUAGCAAGUUAAAAUAAGGCUAGUCCGUUAUCAACUUGAAAAAGUGGCACCGAGUCGGUGCGCCUCGCCAAGUGGCUCAUGUUGGCUUUAAUACGCGGUUCUAUCUAGUUACGCGUUAAACCAACUAGAAUmU*mU*mU
nicking sgRNA 5 DNMT3A ex23	GCGAAGAGGTGGCGGATGAC

## Sheet: Extended Table 3
Supplementary table 3
List of Primers and Probes (Human)
Description	Direction	Sequence 5' -> 3'
B2M PCR primer for Sanger sequencing	Forward	CGCGTTTAATATAAGTGGAGGC
	Reverse	GGAGAACTTGGAGAAGGGAAGT
DNMT3A ddPCR Primer	Forward	CCCATGTCCCTTACACAC
	Reverse	GGTTTCCCAGTCCACTATAC
DNMT3A WT Probe (HEX)		C+CAA+G+C+GGC+TC (+ designate Locked Nucleic Acid/LNA)
DNMT3A R882H Mutant Probe (FAM)		CC+AA+GT+GGC+TCA (+ designate Locked Nucleic Acid/LNA)
List of primers for RT-qPCR
Gene	Direction	Sequence 5' -> 3'
Shmt2	Forward	TGGAACTCGTCTCCATCACAGC
	Reverse	GACTCTACGGAAGTCGTCCTCA
Mthfd2l	Forward	AGCAAGCCACACCTATGTCAGG
	Reverse	CAGTGATGTCCAACAGTTCCTCC
Shmt1	Forward	CTGGAGATGCTGTGTCAGAAGC
	Reverse	TGAGGCTCTACCAGGGCAGTAT
Mthfd1	Forward	AGGAGGTGGATATGCTCAGGTC
	Reverse	GCCAGCAAGTTATTAGCGGCAG
Mthfr	Forward	TACCTCTCTGGAGAGCCGAATC
	Reverse	GGCTGAGAGTTGATGGTGAGGA
Ahcy	Forward	CAGGCTATGGTGATGTGGGCAA
	Reverse	CAGGCTATGGTGATGTGGGCAA
Cbs	Forward	GATCGCCAGAAAGCTGAAGGAG
	Reverse	CCACCTCATAGGCTGTTTGCTC
Bhmt	Forward	GAGTTCCTCAGAGCTGGATCGA
	Reverse	TCATCAGCCACTTGCCGTGCAA
Ndufv1	Forward	GTGGAGGAAGAGATGTCTGTGC
	Reverse	ATGAGCCACCAGGAATCACAGC
Cox15	Forward	GGTCAGCACTGGTTCTCTACTG
	Reverse	CAGCAAACCGTCTCAACCACAG
Dnmt3a	Forward	CGCAAAGCCATCTACGAAGTCC
	Reverse	GCTTGTTCTGCACTTCCACAGC
List of primers for genotyping and detection of recombination
Description	Product size	Direction	Sequence 5' -> 3'
Mx1-Cre genotyping primers (DNA)	Mx1-Cre = 350bp	Forward	GTG AGT TTC GTT TCT GAG CTC C
		Reverse	CGG TTA TTC AAC TTG CAC CA
Dnmt3a fl-R878H genotyping primers (DNA)	WT = 178bp Unrecombined FLOXED = 282bp	Common Forward	CTC CTT GGA TTT GAG GAG GA
		Wild type Reverse	TGC ACA TGA GAA CTG GAT GG
		Mutant Reverse	ATT AAG GGC CAG CTC ATT CC
Dnmt3a R878H recombination primers (DNA)	WT = 338 bp Recombined FLOXED > 338bp	Forward	CCACTAGAACCCTCAGCACA
		Reverse	CCCCAGACCTTTGAAATGCC
Dnmt3a R878H recombination primers (cDNA) for Sanger	WT and MUTANT = 253bp	Forward	CAGAATAGCCAAGTTCAGCAAAG
		Reverse	CTTCAGCGGAGCGAAGAG
List of oligos for cloning
Description	Cloning site	Direction	Sequence 5' -> 3'
NDI1 (plasmid)	EcoRI and SpeI	Forward	ATGAATTCCATCACATCATCGAATTAC
		Reverse	ATCTCGACTAGTGGGCATGTTAATTTCATCTATAAT
BFP (plasmid)	XbaI and BamHI	Forward	ACTTGGTCTAGACGCCACCATGAGCGAGCTGATTAAGGAGAA
		Reverse	GCCCTCGGATCCATTAAGCTTGTGCCCCAGT
shRNA targeting Complex I subunit Ndvufv1 target sequence in bold	BbsI	Top	ACCG GCAGGTCTGATTGGCAAGAAT TCAAGAG ATTCTTGCCAATCAGACCTGC TTTT
		Bottom	CGAAAAAA GCAGGTCTGATTGGCAAGAAT CTCTTGA ATTCTTGCCAATCAGACCTGC
shRNA targeting Complex IV subunit Cox15 target sequence in bold	BbsI	Top	ACCG CCTCAGCACAAGTTACCAGAA TCAAGAG TTCTGGTAACTTGTGCTGAGG TTTT
		Bottom	CGAA AAAA CCTCAGCACAAGTTACCAGAA CTCTTGA ACATCCTGTATCTACTCTCCT
shRNA targeting Shmt2 target sequence in bold	BbsI	Top	ACCG TTCGAGTCTATGCCCTATAA TCAAGAG TTATAGGGCATAGACTCGAAG TTTT
		Bottom	CGAA AAAA TTCGAGTCTATGCCCTATAA CTCTTGA TTATAGGGCATAGACTCGAAG
shRNA targeting Dnmt3a target sequence in bold	BbsI	Top	ACCG CTGCTACATGTGCGGGCATAA TCAAGAG TTATGCCCGCACATGTAGCAG TTTT
		Bottom	CGAA AAAA CTGCTACATGTGCGGGCATAA CTCTTGA TTATGCCCGCACATGTAGCAG

## Sheet: Extended Table 4 
Supplementary table 4
List of antibodies
Antibody	Conjugate	Clone	Supplier	Cat. #
Anti-mouse CD45.2	AF700	Clone: 104	Biolegend	109822
Anti-mouse CD45.1	APC/Fire 750	Clone: A20	Biolegend	110752
Anti-mouse Lineage markers	FITC	Multiple clones	Biolegend	133302
Anti-mouse Lineage markers	PB	Multiple clones	Biolegend	133306
Anti-mouse c-Kit (CD117)	PE	Clone: 2B8	BD Biosciences	553355
Anti-mouse Sca-1	BV421	Clone: D7	Biolegend	108128
Anti-mouse CD150	BV711	Clone: TC15-12F12.2	Biolegend	115941
Anti-mouse CD48	APC	Clone: HM48-1	Biolegend	103412
Anti-mouse TER-119	FITC	Clone:TER-119	Biolegend	116206
Anti-mouse CD11b	PE/Cyanine 7	Clone: M1/70	Biolegend	101216
Anti-mouse Ly-6G/Ly-6C(Gr-1)	BV711	Clone: RB6-8C5	Biolegend	108443
Anti-mouse CD3ε	APC	Clone: 145-2C11	Biolegend	100312
Anti-mouse CD45R/B220	PE	Clone: RA3-6B2	Biolegend	103208
Annexin V	APC	N/A	Biolegend	640941
SYTOX blue	PB	N/A	Thermo Fisher Scientific	34857
SYTOX green	FITC	N/A	Thermo Fisher Scientific	S34860
Anti-Ki-67	FITC	Clone: B56	BD Biosciences	556026
Mouse IgG1κ isotype antibody	FITC	Clone: MOPC-21	BD Biosciences	556026
Anti-mouse CD45.2	TotalSeq™-B0157	Clone: 104	Biolegend	109859
Anti-mouse CD45.1	TotalSeq™-B0178	Clone: A20	Biolegend	110755

## Sheet: Extended Table 5
Supplementary table 5
List of chemicals and reagents
Chemical / Reagent	Manufacturer	Cat #.
Metformin (hydrochloride)	Cayman	13118
Metformin (hydrochloride)	Toronto Research Chemicals	TRC-M258815
L-Methionine	Gold Biotechnology	M-300-1
S-(5'-Adenosyl)-L-methionine(tosylate)	Cayman	16376
S-Adenosylhomocysteine	Cayman	13603
SHIN-1	Tocris	6995
MitoSOX™ Red reagent	Invitrogen	M36008
Tetramethyl rhodamine, Ethyl Ester, Perchlorate (TMRE)	Invitrogen	T669
MitoTracker Green (MTG)	Invitrogen	M7514
